# Supplementary material for: Accurate dispersion interactions from standard density-functional theory methods with small basis sets
Source: Royal Society of Chemistry journal article supplement (doi:10.1039/b919152f), 2010-01-01

Electronic Supplementary Information for:

Standard density functionals with small basis sets can accurately describe dispersion interactions

Iain D. Mackie and Gino A. DiLabio\*

**Figure S1.** Sample Gaussian-03 input file demonstrating the use of DCPs with B971/6-31G(d) and counterpoise corrections, for calculation of the methane dimer binding energy.

**Table S1.** Binding Energies (kcal/mol) for the set of non-covalently bound dimers. Comparison of counterpoise-corrected Method/Basis-DCP and M06-2X/6-31G(d) to high-level ab initio data.

**Table S2.** Deviations in monomer separations (Å), relative to high-level theoretical results, for the set of non-covalently bound dimers using counterpoise-corrected B971/Basis-DCP and M06-2X/6-31G(d).

**Table S3.** Binding Energies (kcal/mol) for the S22 set of non-covalently bound dimers. Comparison of counterpoise-corrected Method/6-31G(d)-DCP and M06-2X/6-31G(d) to high-level ab initio data.

**Figure S5.** Potential energy scan of the methane dimer using counterpoise-corrected method/6-31G(d).

**Figure S6.** Potential energy scan of the methane dimer using counterpoise-corrected method/6-31++G(d,p).

**Figure S7.** Potential energy scan of the ethene dimer using counterpoise-corrected method/6-31G(d).

**Figure S8.** Potential energy scan of the ethene dimer using counterpoise-corrected method/6-31++G(d,p).

---

\* National Institute for Nanotechnology, National Research Council of Canada, 11421 Saskatchewan Drive, Edmonton, Alberta, Canada T6G 2M9. Fax: +1 (780) 641-1601; Tel: +1 (780) 641-1729; E-mail: Gino.DiLabio@nrc.ca

```
#B971 Gen OPT Pseudo=Read Counterpoise=2
```

Methane Dimer using optimised DCPs. The monomer is also calculated with the same DCPs.

```
O 1
```

```
C 0.000000 1.906281 0.000000 1  
H -0.981163 1.425134 0.000000 1  
H 0.553375 1.602684 0.892189 1  
H 0.553375 1.602684 -0.892189 1  
H -0.125117 2.992038 0.000000 1  
C 0.000000 -1.906281 0.000000 2  
H 0.125117 -2.992038 0.000000 2  
H 0.981163 -1.425134 0.000000 2  
H -0.553375 -1.602684 0.892189 2  
H -0.553375 -1.602684 -0.892189 2
```

```
C H O
```

```
6-31G(d)
```

```
****
```

```
C 0
```

```
C 3 0
```

```
F and up
```

```
3
```

```
2 0.08 -0.001578  
2 0.12 0.003490  
2 0.009 -0.0000042
```

```
S - F
```

```
1
```

```
2 1.0 0.0  
P - F
```

```
1
```

```
2 1.0 0.0  
D - F
```

```
1
```

```
2 1.0 0.0
```

**Table S1.** Binding Energies (kcal/mol) for the set of non-covalently bound dimers. Comparison of Method/Basis-DCP and M06-2X/6-31G(d) to high-level *ab initio* data.<sup>a</sup>

|                                                   | B971     |          | PBE      |          | PBE1     |          | M06-2X             | high-level <sup>b</sup> |
|---------------------------------------------------|----------|----------|----------|----------|----------|----------|--------------------|-------------------------|
|                                                   | 3-21G(d) | 6-31G(d) | 3-21G(d) | 6-31G(d) | 3-21G(d) | 6-31G(d) |                    |                         |
| Hydrocarbons                                      |          |          |          |          |          |          |                    |                         |
| CH <sub>4</sub> ·C <sub>6</sub> H <sub>6</sub>    | 1.11     | 1.14     | 1.02     | 1.06     | 1.04     | 1.08     | 1.05               | 1.23                    |
| (CH <sub>4</sub> ) <sub>2</sub>                   | 0.35     | 0.43     | 0.27     | 0.32     | 0.23     | 0.28     | 0.48               | 0.51                    |
| CH <sub>4</sub> ·C <sub>2</sub> H <sub>4</sub>    | 0.63     | 0.63     | 0.62     | 0.61     | 0.54     | 0.53     | 0.32               | 0.50                    |
| P-(C <sub>6</sub> H <sub>6</sub> ) <sub>2</sub>   | 0.72     | 1.35     | 0.78     | 1.38     | 0.55     | 1.23     | -0.34 <sup>c</sup> | 1.70                    |
| SP-(C <sub>6</sub> H <sub>6</sub> ) <sub>2</sub>  | 1.80     | 2.30     | 1.85     | 2.45     | 1.93     | 2.45     | 1.24               | 2.63                    |
| T-(C <sub>6</sub> H <sub>6</sub> ) <sub>2</sub>   | 2.56     | 2.49     | 2.55     | 2.46     | 2.64     | 2.52     | 1.94               | 2.61                    |
| (C <sub>2</sub> H <sub>4</sub> ) <sub>2</sub>     | 1.42     | 1.43     | 1.31     | 1.31     | 1.30     | 1.26     | 1.42               | 1.42                    |
| (C <sub>2</sub> H <sub>2</sub> ) <sub>2</sub>     | 1.61     | 1.67     | 1.58     | 1.35     | 1.54     | 1.56     | 1.25               | 1.38                    |
| P-(C <sub>10</sub> H <sub>8</sub> ) <sub>2</sub>  | 2.67     | 3.83     | 2.73     | 4.08     | 2.48     | 3.95     | 0.36               | 3.78                    |
| PC-(C <sub>10</sub> H <sub>8</sub> ) <sub>2</sub> | 4.43     | 5.53     | 4.73     | 6.04     | 5.16     | 6.16     | 2.81               | 5.28                    |
| T-(C <sub>10</sub> H <sub>8</sub> ) <sub>2</sub>  | 4.95     | 4.64     | 4.88     | 4.54     | 5.14     | 4.79     | 3.50               | 4.34                    |
| TC-(C <sub>10</sub> H <sub>8</sub> ) <sub>2</sub> | 3.63     | 3.38     | 3.56     | 3.30     | 3.59     | 3.32     | 2.99               | 3.09                    |
| SD                                                | -0.22    | 0.03     | -0.22    | 0.04     | -0.20    | 0.06     | -0.95              |                         |
| AD (%)                                            | 21.07    | 11.04    | 21.87    | 12.29    | 22.09    | 13.66    | 33.72              |                         |
| Heterodimers                                      |          |          |          |          |          |          |                    |                         |
| HCN·HF                                            | 8.17     | 6.85     | 8.11     | 6.91     | 8.50     | 6.98     | 6.60               | 7.49                    |
| C <sub>2</sub> H <sub>4</sub> ·HF                 | 5.08     | 5.19     | 5.36     | 5.58     | 5.19     | 5.28     | 4.69               | 4.50                    |
| (CF <sub>4</sub> ) <sub>2</sub>                   | 0.90     | 0.85     | 1.14     | 0.93     | 0.91     | 0.83     | 0.39               | 0.78                    |
| (CH <sub>3</sub> F) <sub>2</sub>                  | 3.06     | 2.26     | 3.03     | 2.19     | 2.91     | 2.10     | 1.83               | 2.33                    |
| CH <sub>4</sub> ·HF                               | 1.59     | 1.52     | 1.75     | 1.73     | 1.58     | 1.48     | 1.31               | 1.65                    |
| CH <sub>4</sub> ·NH <sub>3</sub>                  | 1.58     | 1.09     | 1.80     | 1.15     | 1.53     | 1.03     | 0.88               | 0.76                    |
| (CO <sub>2</sub> ) <sub>2</sub>                   | 1.66     | 1.39     | 1.51     | 1.28     | 1.64     | 1.33     | 1.33               | 1.37                    |
| (H <sub>2</sub> CO) <sub>2</sub>                  | 3.25     | 3.26     | 3.00     | 2.98     | 3.16     | 3.16     | 3.15               | 3.72                    |
| H <sub>2</sub> O·C <sub>6</sub> H <sub>6</sub>    | 3.84     | 3.49     | 3.71     | 3.42     | 3.83     | 3.48     | 3.51               | 3.17                    |
| (H <sub>3</sub> CCN) <sub>2</sub>                 | 5.05     | 5.65     | 4.96     | 5.52     | 5.06     | 5.63     | 5.80               | 6.16                    |
| SD                                                | 0.23     | -0.04    | 0.24     | -0.02    | 0.24     | -0.06    | -0.24              |                         |
| AD (%)                                            | 25.41    | 11.81    | 31.20    | 15.81    | 24.87    | 12.34    | 15.90              |                         |
| SD (Total)                                        | -0.02    | 0.00     | 0.01     | 0.01     | 0.00     | 0.00     | -0.63              |                         |
| AD (%) (Total)                                    | 23.04    | 11.39    | 26.11    | 13.89    | 23.35    | 13.06    | 25.62              |                         |

<sup>a</sup>High-level data are generally of large basis set, CCSD(T) quality, with the exception of those for the naphthalene dimers. <sup>b</sup>For refs., see Full text. <sup>c</sup>not bound, error of 100 % assigned.

**Table S2.** Deviations in monomer separations (Å), relative to high-level theoretical results, for the set of non-covalently bound dimers using B971/Basis-DCP and M06-2X/6-31G(d).

|                                                   |                                                     | B971     |          | PBE      |          | PBE1     |          | M06-2X | high-level <sup>b</sup> |
|---------------------------------------------------|-----------------------------------------------------|----------|----------|----------|----------|----------|----------|--------|-------------------------|
|                                                   |                                                     | 3-21G(d) | 6-31G(d) | 3-21G(d) | 6-31G(d) | 3-21G(d) | 6-31G(d) |        |                         |
| Hydrocarbons                                      |                                                     |          |          |          |          |          |          |        |                         |
| CH <sub>4</sub> ·C <sub>6</sub> H <sub>6</sub>    | H <sub>4</sub> C-CM(C <sub>6</sub> H <sub>6</sub> ) | 0.1      | 0.1      | 0.1      | 0        | 0.1      | 0        | 0      | 3.8                     |
| (CH <sub>4</sub> ) <sub>2</sub>                   | C-C                                                 | 0.1      | 0.1      | 0.3      | 0.2      | 0.3      | 0.1      | -0.1   | 3.6                     |
| CH <sub>4</sub> ·C <sub>2</sub> H <sub>4</sub>    | H <sub>4</sub> C-CM(C <sub>2</sub> H <sub>4</sub> ) | 0        | -0.1     | 0        | -0.1     | 0        | -0.1     | 0      | 4.2                     |
| P-(C <sub>6</sub> H <sub>6</sub> ) <sub>2</sub>   | CM-CM                                               | 0.1      | 0        | 0.1      | -0.1     | 0.2      | -0.1     | 0      | 3.9                     |
| SP-(C <sub>6</sub> H <sub>6</sub> ) <sub>2</sub>  | CM-CM                                               | 0.2      | 0.1      | 0.1      | -0.1     | 0        | -0.1     | -0.1   | 3.9                     |
| T-(C <sub>6</sub> H <sub>6</sub> ) <sub>2</sub>   | CM-CM                                               | 0        | 0        | 0        | 0        | 0        | 0        | -0.1   | 5.0                     |
| (C <sub>2</sub> H <sub>4</sub> ) <sub>2</sub>     | CM-CM                                               | -0.1     | -0.1     | -0.1     | -0.1     | -0.1     | -0.1     | -0.3   | 3.8                     |
| (C <sub>2</sub> H <sub>2</sub> ) <sub>2</sub>     | CM-CM                                               | -0.1     | -0.1     | -0.1     | -0.1     | -0.1     | -0.1     | -0.2   | 4.3                     |
| P-(C <sub>10</sub> H <sub>8</sub> ) <sub>2</sub>  | CM-CM                                               | 0        | 0        | 0        | -0.1     | 0        | -0.1     | -0.2   | 3.8                     |
| PC-(C <sub>10</sub> H <sub>8</sub> ) <sub>2</sub> | CM-CM                                               | 0        | -0.1     | -0.2     | -0.2     | -0.3     | -0.2     | -0.1   | 3.6                     |
| T-(C <sub>10</sub> H <sub>8</sub> ) <sub>2</sub>  | CM-CM                                               | 0.1      | 0.1      | 0.1      | 0.1      | 0        | 0.1      | 0      | 5.0                     |
| TC-(C <sub>10</sub> H <sub>8</sub> ) <sub>2</sub> | CM-CM                                               | 0.1      | 0.1      | 0.1      | 0        | 0        | 0        | -0.1   | 5.2                     |
| MAD                                               |                                                     | 0.07     | 0.07     | 0.10     | 0.09     | 0.09     | 0.08     | 0.10   |                         |
| Heterodimers                                      |                                                     |          |          |          |          |          |          |        |                         |
| HCN·HF                                            | N-HF                                                | 0        | 0        | 0        | 0        | -0.1     | 0        | 0      | 1.9                     |
| C <sub>2</sub> H <sub>4</sub> ·HF                 | FH-CM(C <sub>2</sub> H <sub>4</sub> )               | 0.1      | 0        | 0        | 0        | 0        | 0        | 0      | 2.2                     |
| (CF <sub>4</sub> ) <sub>2</sub>                   | C-C                                                 | -0.2     | 0        | -0.2     | 0        | -0.2     | 0        | -0.1   | 4.0                     |
| (CH <sub>3</sub> F) <sub>2</sub>                  | C-C                                                 | -0.2     | -0.1     | -0.2     | -0.1     | -0.2     | -0.1     | -0.2   | 3.9                     |
| CH <sub>4</sub> ·HF                               | C-HF                                                | 0.1      | 0.1      | 0.1      | 0.1      | 0.1      | 0.1      | 0.1    | 2.3                     |
| CH <sub>4</sub> ·NH <sub>3</sub>                  | C-N                                                 | -0.3     | -0.2     | -0.3     | -0.2     | -0.3     | -0.2     | -0.2   | 3.9                     |
| (CO <sub>2</sub> ) <sub>2</sub>                   | C-C                                                 | 0        | 0        | 0        | 0        | 0        | 0        | -0.2   | 3.6                     |
| (H <sub>2</sub> CO) <sub>2</sub>                  | C-C                                                 | 0        | 0        | 0        | 0        | -0.1     | -0.1     | 0      | 3.6                     |
| H <sub>2</sub> O·C <sub>6</sub> H <sub>6</sub>    | O-CM(C <sub>6</sub> H <sub>6</sub> )                | 0        | 0        | 0        | 0        | 0        | 0        | -0.2   | 3.4                     |
| (H <sub>3</sub> CCN) <sub>2</sub>                 | C-C                                                 | 0        | -0.1     | -0.1     | -0.1     | -0.1     | -0.1     | -0.2   | 3.4                     |
| MAD                                               |                                                     | 0.09     | 0.05     | 0.09     | 0.05     | 0.11     | 0.06     | 0.12   |                         |
| MAD (Total)                                       |                                                     | 0.08     | 0.06     | 0.09     | 0.07     | 0.10     | 0.07     | 0.11   |                         |

<sup>a</sup>CM = centre-of-mass of heavy atoms. <sup>b</sup>High-level data are generally of large basis set, CCSD(T) quality, with the exception of those for the naphthalene dimers. For refs., see Full text.

**Table S3.** Binding Energies (kcal/mol) for the S22 set of non-covalently bound dimers. Comparison of Method/6-31G(d)-DCP and M06-2X/6-31G(d) to high-level *ab initio* data.<sup>a</sup>

|                                                                                                                  | B971  | PBE   | PBE1  | M06-2X | high-level |
|------------------------------------------------------------------------------------------------------------------|-------|-------|-------|--------|------------|
| <b>Hydrogen bonded</b>                                                                                           |       |       |       |        |            |
| (NH <sub>3</sub> ) <sub>2</sub>                                                                                  | 3.54  | 3.68  | 3.56  | 4.14   | 3.17       |
| (H <sub>2</sub> O) <sub>2</sub>                                                                                  | 6.07  | 6.37  | 6.25  | 6.32   | 5.02       |
| (HCOOH) <sub>2</sub>                                                                                             | 16.63 | 17.79 | 17.57 | 16.60  | 18.61      |
| (HCONH <sub>2</sub> ) <sub>2</sub>                                                                               | 14.70 | 15.48 | 15.29 | 14.72  | 15.96      |
| uracil dimer (C <sub>2h</sub> )                                                                                  | 18.11 | 18.83 | 18.93 | 17.72  | 20.65      |
| 2-C <sub>8</sub> H <sub>11</sub> NO <sub>3</sub> ;2-(C <sub>5</sub> H <sub>6</sub> N <sub>2</sub> ) <sub>2</sub> | 15.31 | 16.68 | 16.09 | 14.74  | 16.71      |
| adenine-thymine WC                                                                                               | 14.66 | 15.77 | 15.37 | 14.04  | 16.37      |
| SD                                                                                                               | -1.07 | -0.27 | -0.49 | -1.17  |            |
| AD (%)                                                                                                           | 11.76 | 9.03  | 9.27  | 16.47  |            |
| <b>Dispersion-dominated</b>                                                                                      |       |       |       |        |            |
| (CH <sub>4</sub> ) <sub>2</sub>                                                                                  | 0.43  | 0.32  | 0.28  | 0.48   | 0.51       |
| (C <sub>2</sub> H <sub>4</sub> ) <sub>2</sub>                                                                    | 1.43  | 1.31  | 1.26  | 1.42   | 1.42       |
| C <sub>6</sub> H <sub>6</sub> ·CH <sub>4</sub>                                                                   | 1.14  | 1.06  | 1.08  | 1.05   | 1.23       |
| SP-(C <sub>6</sub> H <sub>6</sub> ) <sub>2</sub>                                                                 | 2.30  | 2.45  | 2.45  | 1.24   | 2.63       |
| (C <sub>4</sub> H <sub>4</sub> N <sub>2</sub> ) <sub>2</sub>                                                     | 3.54  | 3.57  | 3.70  | 3.53   | 4.42       |
| uracil dimer (C <sub>2</sub> )                                                                                   | 7.23  | 7.30  | 7.61  | 8.17   | 10.12      |
| C <sub>8</sub> H <sub>7</sub> N·C <sub>6</sub> H <sub>6</sub> (C <sub>1</sub> )                                  | 3.89  | 4.19  | 4.31  | 2.81   | 5.22       |
| adenine-thymine stack                                                                                            | 8.81  | 8.96  | 9.42  | 10.10  | 12.23      |
| SD                                                                                                               | -1.13 | -1.08 | -0.96 | -1.12  |            |
| AD (%)                                                                                                           | 17.35 | 19.95 | 19.61 | 22.07  |            |
| <b>Mixed complexes</b>                                                                                           |       |       |       |        |            |
| C <sub>2</sub> H <sub>4</sub> ·C <sub>2</sub> H <sub>2</sub>                                                     | 2.02  | 2.05  | 1.94  | 1.55   | 1.53       |
| H <sub>2</sub> O·C <sub>6</sub> H <sub>6</sub>                                                                   | 3.49  | 3.42  | 3.48  | 3.51   | 3.17       |
| NH <sub>3</sub> ·C <sub>6</sub> H <sub>6</sub>                                                                   | 1.99  | 1.91  | 1.93  | 2.10   | 2.35       |
| HCN·C <sub>6</sub> H <sub>6</sub>                                                                                | 4.82  | 4.77  | 5.10  | 4.76   | 4.46       |
| T-(C <sub>6</sub> H <sub>6</sub> ) <sub>2</sub>                                                                  | 2.49  | 2.46  | 2.52  | 1.94   | 2.61       |
| T-C <sub>8</sub> H <sub>7</sub> N·C <sub>6</sub> H <sub>6</sub>                                                  | 5.29  | 5.38  | 5.40  | 4.76   | 5.73       |
| (C <sub>6</sub> H <sub>5</sub> OH) <sub>2</sub>                                                                  | 6.99  | 7.03  | 7.17  | 7.04   | 7.05       |
| SD                                                                                                               | 0.03  | 0.02  | 0.09  | -0.18  |            |
| AD (%)                                                                                                           | 11.26 | 11.48 | 11.36 | 10.31  |            |
| SD (Total)                                                                                                       | -0.74 | -0.47 | -0.47 | -0.84  |            |
| AD (%) (Total)                                                                                                   | 13.63 | 13.78 | 13.70 | 16.55  |            |

<sup>a</sup>For ref., see Full text; CCSD(T)/CBS energies.

**Figure S5.** Potential energy scan of the methane dimer using counterpoise-corrected method/6-31G(d).

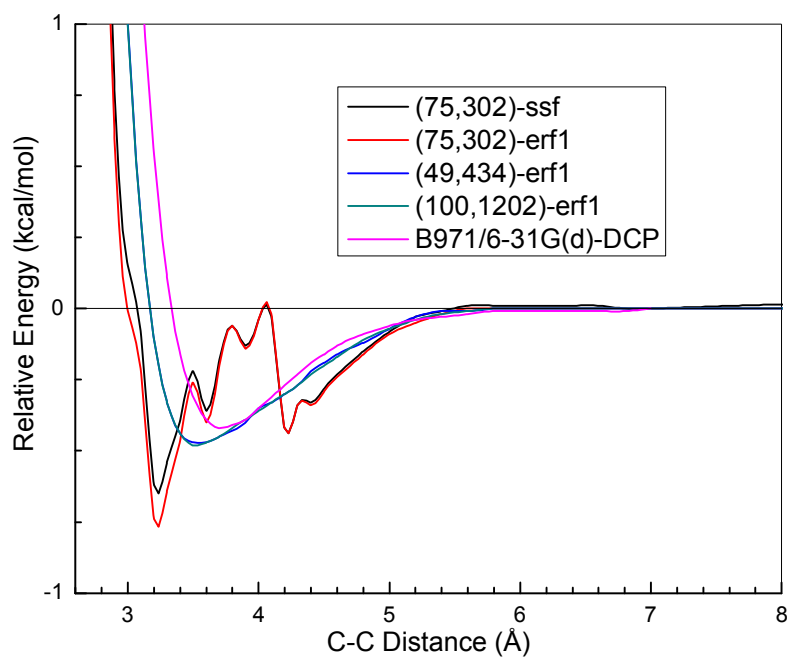

**Figure S6.** Potential energy scan of the methane dimer using counterpoise-corrected method/6-31++G(d,p).

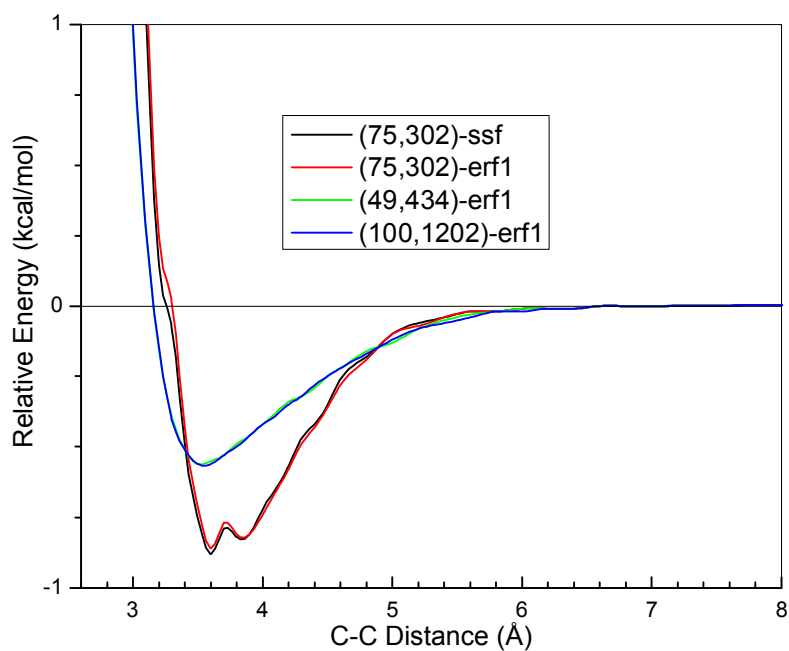

**Figure S7.** Potential energy scan of the ethene dimer using counterpoise-corrected method/6-31G(d).

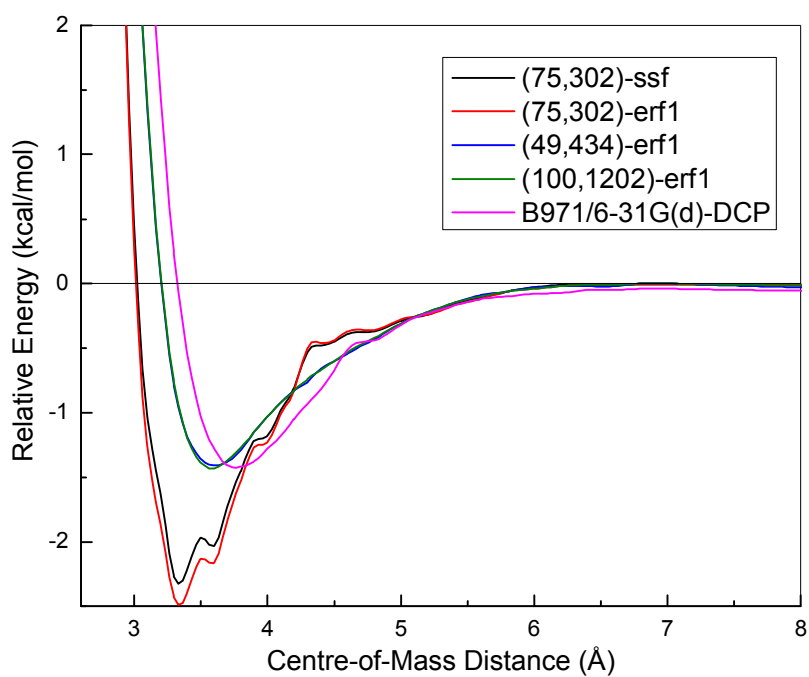

**Figure S8.** Potential energy scan of the ethene dimer using counterpoise-corrected method/6-31++G(d,p).

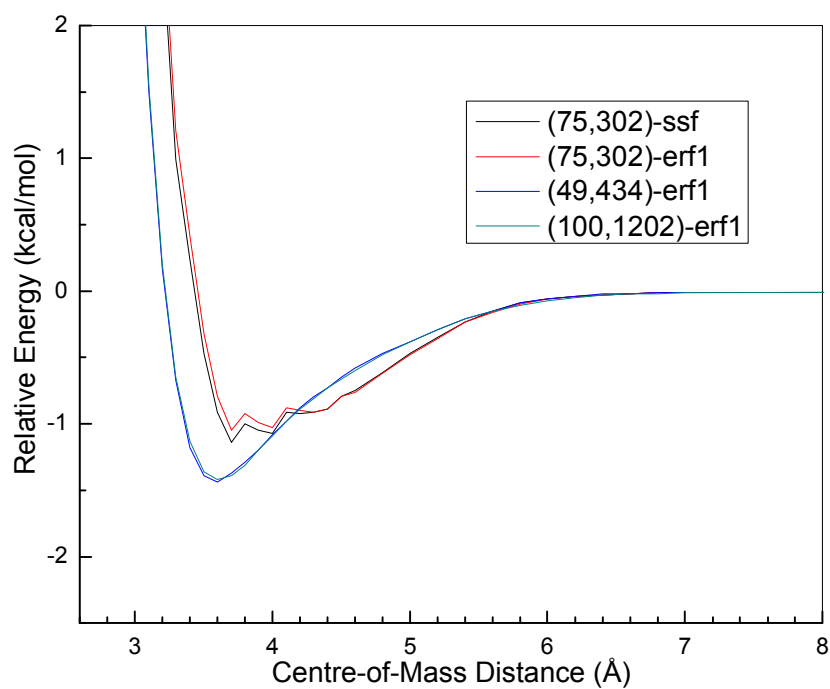

Supplement: b919152f.pdf [file b919152f.pdf]
